# Supplementary material
Source: publisher site journal article supplement (https://www.dovepress.com/article/249433)
Supplement: Supplementary file 1 [file get_supplementary_file.php]

| Country |
| --- |
| Site # |
| Name |
|  |
|  |
| **Argentina** |
| **161** |
| Comisión Conjunta de Investigación en Salud (CCIS) |
| Comité de Ética del Instituto Médico Platense - CEDIMP |
| **422** |
| Comisión Conjunta de Investigación en Salud (CCIS) |
| Comité de Bioética CIMeL |
| **Australia** |
| **148** |
| Melbourne Health Human Research Ethics Committee |
| **Austria** |
| **21** |
| Ethikkomission der Medizinischen Universität Wien |
| Ethikkommission der Medizinischen Universität Wien |
| Ethik-Kommission der Medizinischen Universität Wien und des Allgemeinen Krankenhauses der Stadt Wien |
| **405** |
| Ethikkommission für das Bundesland Salzburg |
| **Belgium** |
| **24** |
| UZ Antwerpen |
| **42** |
| Cliniques Universitaires Saint-Luc - Comité d'Ethique |
| UZ Antwerpen |
| **67** |
| UZ Antwerpen |
| **Brazil** |
| **146** |
| Comitê de Ética em Pesquisa do Hospital de Clínicas de Porto Alegre |
| **Canada** |
| **141** |
| University Health Network Ethics Research Board |
| **152** |
| Nova Scotia Health Authority Research Ethics Board |
| **155** |
| Centre Hospitalier de Sherbrooke |
| **156** |
| Hopital du Sacre-Coeur de Montreal Research Ethics Board |
| **157** |
| The University of British Columbia |
| **158** |
| Health Research Ethics Board |
| **172** |
| Conjoint Health REB (CHREB) |
| **411** |
| Health Research Ethics Authority |
| **419** |
| SickKids REB |
| **Czech Republic** |
| **31** |
| Eticka komise Vseobecne fakultni nemocnice v Praze |
| **Finland** |
| **117** |
| Varsinais-Suomen sairaanhoitopiirin eettinen toimikunta |
| **France** |
| **79** |
| Comité Consultatif sur le Traitement de l'Information en matière de Recherche dans le domain Santé |
| **Germany** |
| **3** |
| Ethik-Kommission der Landesärztekammer Rheinland-Pfalz |
| **26** |
| Ethikkomission der Ärztekammer Hamburg |
| Ethik-Kommission der Ärztekammer Hamburg |
| Ethik-Kommission der Landesärztekammer Rheinland-Pfalz |
| **38** |
| Ethik-Kommission der Landesärztekammer Rheinland-Pfalz |
| **106** |
| Ethik-Kommission der Medizinischen Fakultät der Universität Würzburg |
| **173** |
| Ethik-Kommission der Medizinischen Fakultät der Universität zu Köln |
| **207** |
| Ethik-Kommission der Landesärztekammer Rheinland-Pfalz |
| **266** |
| Ethikkommission an der Universitätsmedizin Greifswald |
| **267** |
| Ethik-Kommission der Ärztekammer Westfalen-Lippe und der Medizinischen Fakultät der WWU Munster |
| **401** |
| Ethikkommission der Landesärztekammer Baden-Württemberg |
| **406** |
| Ethikkommission der Medizinischen Fakultät der Ruhr-Universität Bochum |
| **421** |
| Ethikkommission der Landesärztekammer Hessen |
| **Hungary** |
| **114** |
| Egeszsegugyi Tudomanyos Tanacs Tudomanyos es Kutatasetikai Bizottsaga |
| **Israel** |
| **188** |
| Shaare Zedek Medical Center EC |
| **Italy** |
| **9** |
| Comitato Etico Area Monza Brianza |
| Comitato Etico Brianza |
| **19** |
| Comitato Etico Regionale delle Marche |
| **29** |
| Comitato Etico Lazio 1 |
| **89** |
| Comitato Etico Regionale Calabria Sezione Area Centro |
| **132** |
| Comitato Etico Dell Universita Cattolica del Sacro Cuore Policlinico Universitario Agostino Gemelli |
| **194** |
| Comitato Etico Azienda Ospedaliero Universitaria di Ferrara |
| **210** |
| Comitato Etico Palermo 1 |
| **218** |
| Comitato Etico Area Pavia |
| Comitato Etico AREA PAVIA presso IRCCS San Matteo |
| **257** |
| Comitato Etico dell'Università Federico II |
| **276** |
| Comitato Etico CE A.O. "Città della Salute e della Scienza" di Torino |
| Comitato Etico Interaziendale A.O.U. Città della Salute e della Scienza di Torino - A.O. Ordine Maur |
| **Korea, Republic of** |
| **417** |
| Pusan National University Yangsan Hospital IRB |
| **423** |
| Asan Medical Center Institutional Review Board |
| **Portugal** |
| **214** |
| Comissão de Ética para a Investigação Clínica - CEIC |
| Comissão de Ética para a Saúde Centro Hospitalar do Alto Ave |
| **216** |
| Comissão de Ética para a Saúde Centro Hospitalar de Lisboa Norte |
| **Russian Federation** |
| **412** |
| Ethics Committee at Moscow State Medical University n.a. I.M. Sechenov |
| **Slovenia** |
| **129** |
| Ethics Committee of the General Hospital Slovenj Gradec |
| **Spain** |
| **17** |
| CEIC Hospital Universitario La Paz |
| **18** |
| C.H. Universitario de Albacete |
| **37** |
| CEIC Fundación Puigvert |
| **40** |
| CEIC Hospital Germans Trias i Pujol |
| CEIC Hospital Universitari German Trias i Pujol |
| CEIC Hospital Universitario La Paz |
| **44** |
| CEIC de Asturias |
| **45** |
| CEIC de Andalucia (CCEIBA) |
| CEIC de Aragon (CEICA) |
| **55** |
| CEIC de Asturias |
| **84** |
| CEIC Complejo Asistencial de Leon |
| **85** |
| CEIC Hospital Universitari de Bellvitge |
| CEIC Hospital Universitario La Paz |
| **86** |
| CEIC Hospital Clinic de Barcelona |
| CEIC Hospital Universitario La Paz |
| **169** |
| CEIC Hospital General de Elda |
| CEIC Hospital Universitario La Paz |
| **170** |
| CEIC de Galicia (CAEI) |
| **171** |
| CEIC Consorcio Hospitalario Provincial de Castellón |
| CEIC Hospital Universitario La Paz |
| **178** |
| CEIC Hospital General de Elda |
| **180** |
| CEIC Hospital General Universitario de Elche |
| **183** |
| CEIC Hospital General Universitario de Alicante |
| CEIC Hospital Universitario La Paz |
| **185** |
| CEIC de Andalucia (CCEIBA) |
| CEIC Hospital de Torrecárdenas (FIBAO) |
| **186** |
| CEIC de Andalucia (CCEIBA) |
| CEIC Provincial de Málaga |
| **187** |
| CEIC Islas Baleares (CEIC-IB) |
| **192** |
| CEIC Fundacion Sant Joan de Deu |
| **195** |
| CEIC de Andalucia (CCEIBA) |
| Comité de ética de la investigación Biomédica Provincial de Granada Hospital Univ San Cecilio |
| **201** |
| CEIC Hospital de Donostia |
| **202** |
| CEIC de Aragon (CEICA) |
| **204** |
| CEIC Hospital Universitario Infanta Cristina |
| **205** |
| CEIC Hospital Clínico Universitario de Valencia |
| CEIC Hospital Universitario La Paz |
| **212** |
| CEIC Hospital Universitario La Paz |
| CEIC Hospital Universitario Vall d'Hebrón |
| **219** |
| CEIC Hospital de Girona Dr Josep Trueta |
| **220** |
| CEIC Hospital Universitario La Paz |
| CEIC Hospital Universitario y Politecnico la Fe |
| **250** |
| CEIC de Euskadi |
| **251** |
| CEIC Hospital Universitario Dr. Peset |
| CEIC Hospital Universitario La Paz |
| **252** |
| CEIC Hospital Universitari Arnau de Vilanova |
| **254** |
| CEIC de Galicia (CAEI) |
| **275** |
| CEIC Hospital General Universitario de Guadalajara |
| CEIC Hospital Universitario La Paz |
| **420** |
| CEIC de Aragon (CEICA) |
| **604** |
| CEIC Hospital General Universitario de Alicante |
| **Switzerland** |
| **6** |
| Kantonale Ethikkommission Zürich |
| **23** |
| Commission Cantonale (VD) d’éthique de la recherche sur l’être humain |
| **Taiwan, Province of China** |
| **268** |
| Institutional Review Board Taipei Veterans General Hospital |
| **407** |
| Institutional Review Board Kaohsiung Medical University Chung-Ho Memorial Hospital |
| Institutional Review Board of the Veterans General Hospital Kaohsiung |
| **408** |
| Institutional Review Board of Taichung Veterans general Hospital |
| The Institutional Review Board of Taichung Veterans General Hospital |
| **409** |
| Institutional Review Board of National Cheng Kung University Hospital |
| National Cheng Kung University Hospital Human Experiment and Ethic Committee |
| **United Kingdom** |
| **15** |
| NRES Committee East of England - Cambridge South |
| **16** |
| Health Research Authority |
| NRES Committee East of England - Cambridge South |
| **184** |
| NRES Committee East of England - Cambridge South |
| **213** |
| NRES Committee East of England - Cambridge South |
| **255** |
| NRES Committee East of England - Cambridge South |
| **256** |
| NRES Committee East of England - Cambridge South |
| **413** |
| NRES Committee East of England - Cambridge South |
